# Supplementary material for: Synergistic Sorafenib with Jianpi Huayu Decoction Resulted in Tumor Regression and Prevented Adverse Events in Hepatocellular Carcinoma by Remodeling the Gut Microbiota
Source: Research Square preprint supplement (doi:10.21203/rs.3.rs-844760/v1), 2021-09-02

Supplementary Material

Supplement 1A


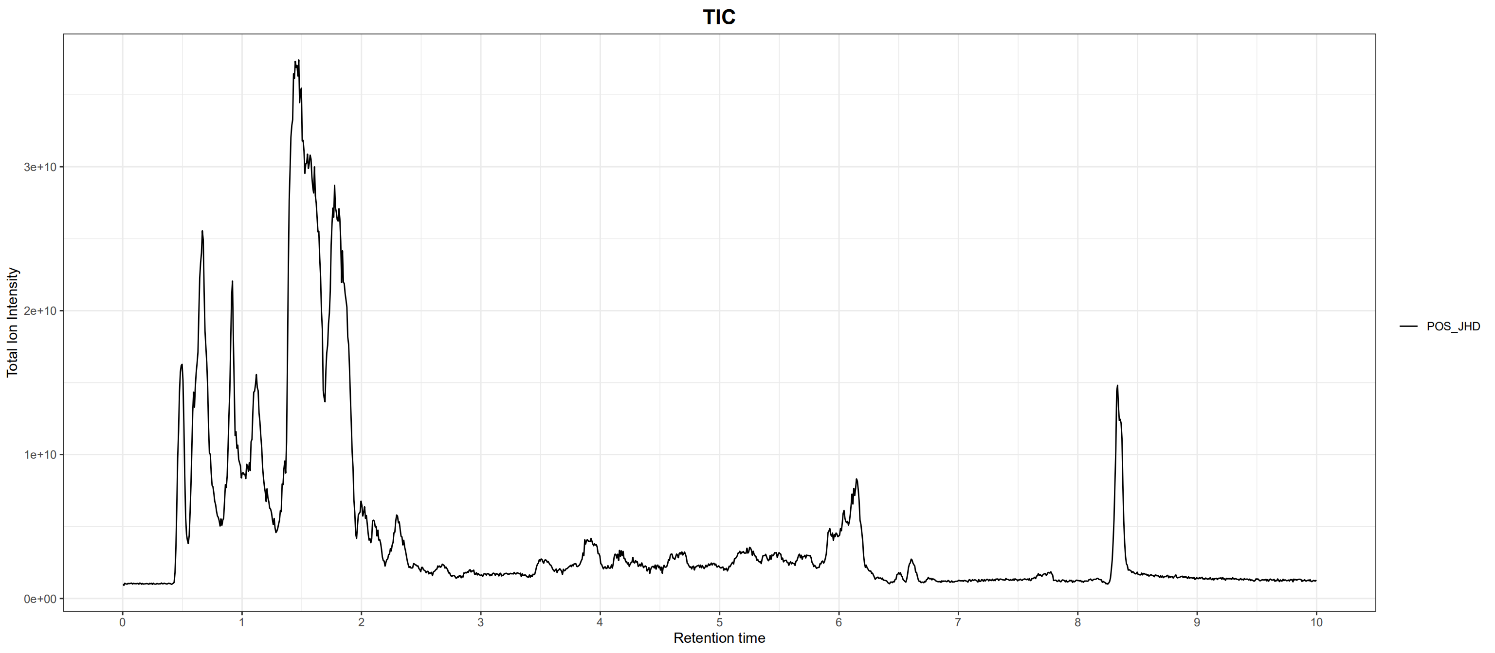

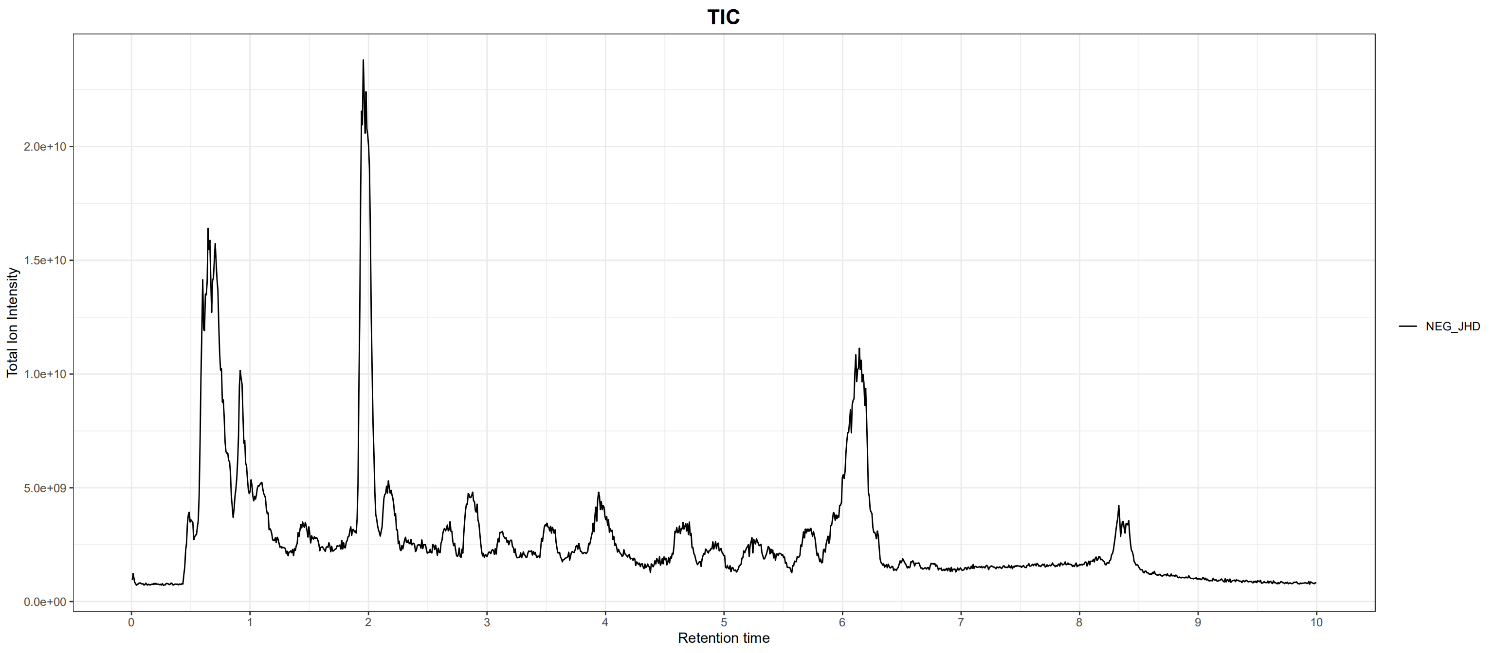


**Supplement 1B. Original gels of protein expression in Figure 6C**

β-actin iNOS


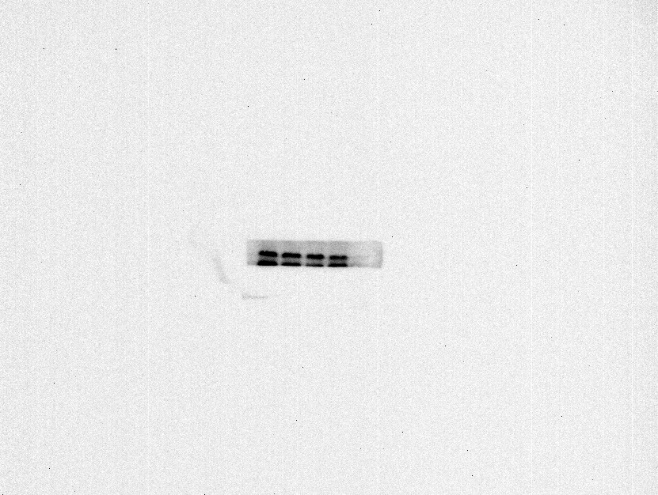

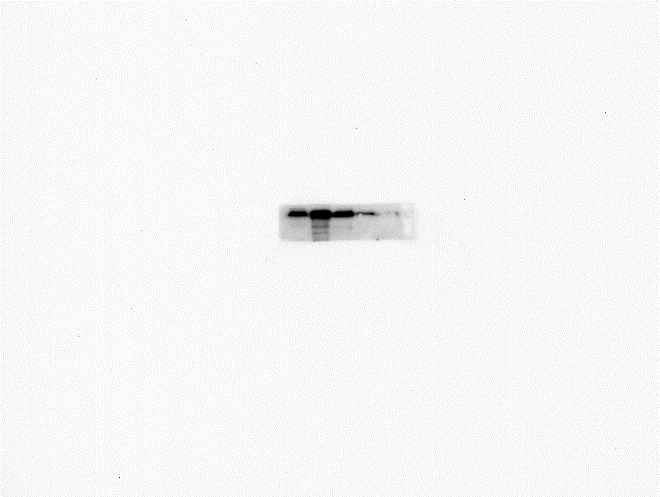


β-actin STAT3


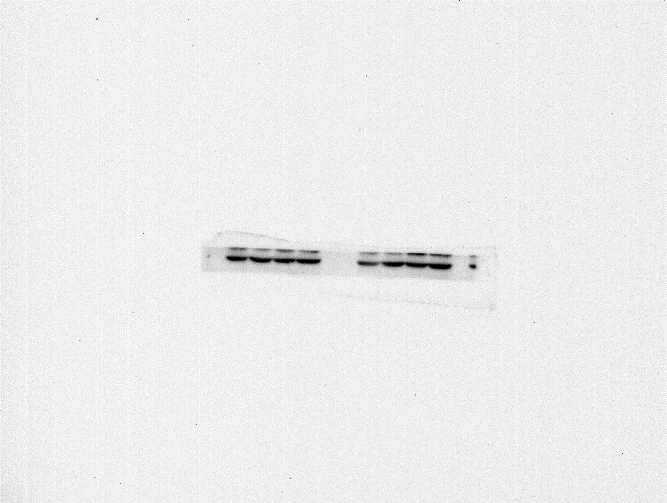

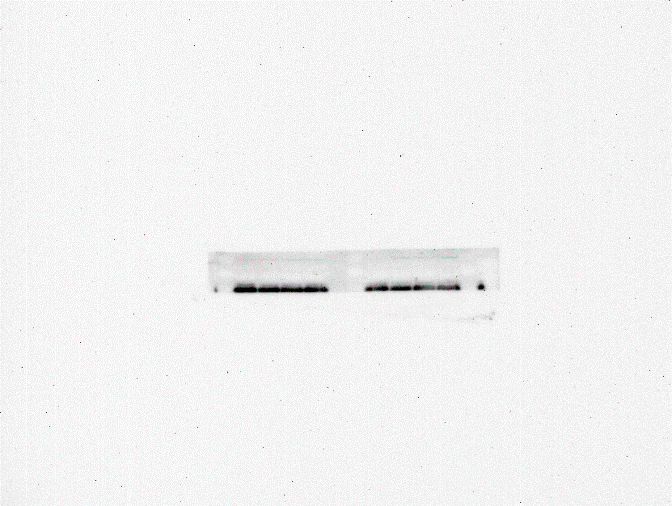


pSTAT3


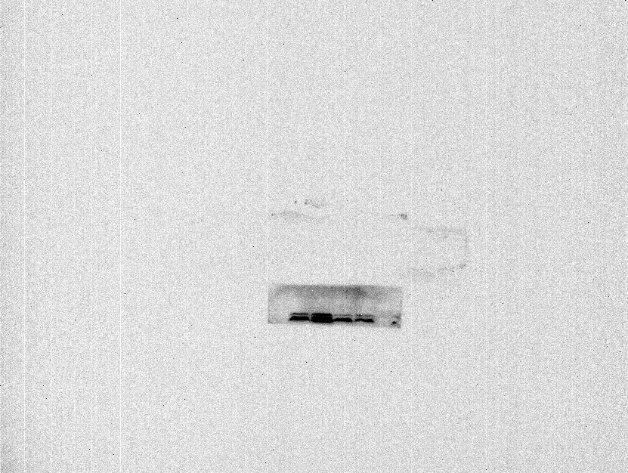

Supplement: Supplementary file 1 [file a149a061e3fa88327eea8828.docx]
